# Supplementary material
Source: Springer Nature journal article supplement (https://www.springermedizin.de/resource/supplementary/13024_2014_544_MOESM3_ESM.pdf/9644364)
Supplement: MOESM3 [file 9644364]

**Supplemental Table S1. Significant effects of diet and exercise at different levels of taxonomy.**

|                     | Main effects 2-way ANOVA |      |          | post-hoc testing |           |                 |             |               |
|---------------------|--------------------------|------|----------|------------------|-----------|-----------------|-------------|---------------|
|                     | High fat diet            |      | exercise | interaction      | ND vs HFD | ND+ex vs HFD+ex | ND vs ND+ex | HFD vs HFD+ex |
| <b>Phylum</b>       |                          |      |          |                  |           |                 |             |               |
| Bacteroidetes       | ↓                        | **** | ↓        | **               | ****      | ****            | *           | *             |
| Firmicutes          | ↑                        | **** | ↑        | **               | ****      | ****            | *           | *             |
| Tenericutes         | ↓                        | **   |          |                  |           |                 | *           |               |
| Proteobacteria      | ↑                        | *    | ↑        | *                |           |                 |             |               |
| Actinobacteria      |                          |      | ↑        | *                |           |                 |             |               |
| <b>Class</b>        |                          |      |          |                  |           |                 |             |               |
| Bacteroidia         | ↓                        | **** | ↓        | ***              | ****      | ****            | *           | *             |
| Clostridia          | ↑                        | **** | ↑        | **               | ****      | ****            | *           | *             |
| Erysipelotrichia    | ↓                        | **** |          |                  | **        | ***             |             |               |
| Mollicutes          | ↓                        | **   |          | *                | **        |                 | *           |               |
| Bacilli             | ↑                        | **   |          |                  |           |                 |             |               |
| Gammaproteobacteria | ↑                        | *    |          |                  |           |                 |             |               |
| Negativicutes       | ↑                        | *    |          |                  |           |                 |             |               |
| Betaproteobacteria  |                          |      | ↑        | **               |           |                 |             | *             |
| Actinobacteria      |                          |      | ↑        | *                |           |                 |             |               |
| Sphingobacteria     |                          |      | ↑        | *                |           | *               |             | *             |
| Flavobacteria       |                          |      | ↑        | *                |           |                 |             | *             |
| Alphaproteobacteria |                          |      | ↑        | *                |           |                 |             | *             |
| <b>Order</b>        |                          |      |          |                  |           |                 |             |               |
| Bacteroidales       | ↓                        | **** | ↓        | ***              | ****      | ****            | *           | *             |
| Clostridiales       | ↑                        | **** | ↑        | **               | ****      | ****            | *           | *             |
| Erysipelotrichales  | ↓                        | **** |          |                  | **        | ***             |             |               |
| Lactobacillales     | ↑                        | ***  |          |                  |           | *               |             |               |
| Anaeroplasmatales   | ↓                        | **   |          | *                | **        |                 | *           |               |
| Bacillales          | ↓                        | **   |          |                  |           |                 |             |               |
| Pseudomonadales     | ↑                        | *    | ↑        | *                |           | *               |             | *             |
| Enterobacteriales   | ↑                        | *    |          |                  |           |                 |             |               |
| Selenomonadales     | ↑                        | *    |          |                  |           |                 |             |               |
| Burkholderiales     |                          |      | ↑        | **               |           |                 |             | *             |
| Actinomycetales     |                          |      | ↑        | *                |           |                 |             |               |
| Coriobacteriales    |                          |      | ↑        | *                |           |                 | *           |               |
| Sphingobacteriales  |                          |      | ↑        | *                |           | *               |             | *             |
| Flavobacteriales    |                          |      | ↑        | *                |           |                 |             | *             |
| Caulobacterales     |                          |      | ↑        | *                |           |                 |             | *             |
| Rhizobiales         |                          |      | ↑        | *                |           |                 |             | *             |
